# Supplementary material for: Genome-Wide Analyses of Tea Plant Stress-Associated Proteins (SAPs) Reveal the Role of CsSAP12 in Increased Drought Tolerance in Transgenic Tomatoes
Source: MDPI journal article supplement (doi:10.3390/horticulturae8050363), 2022-04-21
Supplement: s1 [file s1]

# Genome-Wide Analyses of Tea Plant Stress-Associated Proteins (SAPs) Reveal the Role of *CsSAP12* in Increased Drought Tolerance in Transgenic Tomatoes

Shu-Chen Fan <sup>1,†</sup>, Chun Li <sup>1,†</sup>, Shao-Hua Li<sup>1</sup>, Jie Tang <sup>1</sup>, Hong-Di Shi <sup>1</sup>, Tian-Ming Yang <sup>1,2</sup>, Ming-Zhi Liang <sup>2,\*</sup> and Dan-Dan Liu <sup>1,\*</sup>

## Supplementary Materials List

**Supplementary Figure S1.** Protein sequence alignment of SlSAP4 (GenBank accession number: XP 019066408) and CsSAP12 by Clustalx.

**Supplementary Figure S2.** The qRT-PCR amplification curve of *CsSAP12* and *SlGRX1*.

**Supplementary Figure S3.** Phenotypes of *CsSAP12*-overexpressed transgenic lines and wildtype tomatoes.

**Supplementary Table S1.** Application of primers used for PCR and qRT-PCR.

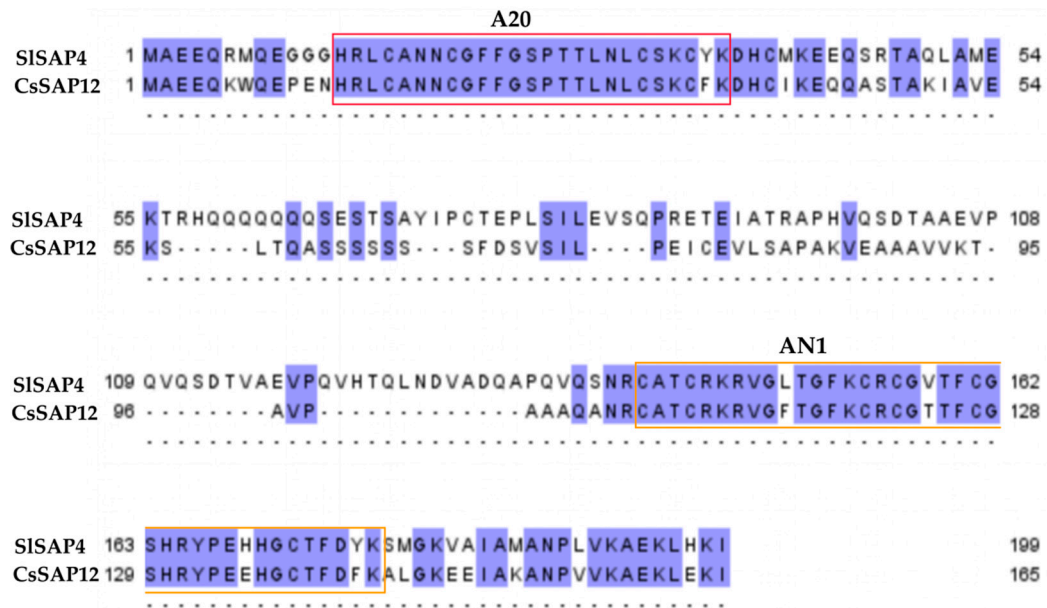

**Supplementary Figure S1.** Protein sequence alignment of SISAP4 (GenBank accession number: XP 019066408) and CsSAP12 by Clustalx; A20 and AN1 domains are indicated at the top.

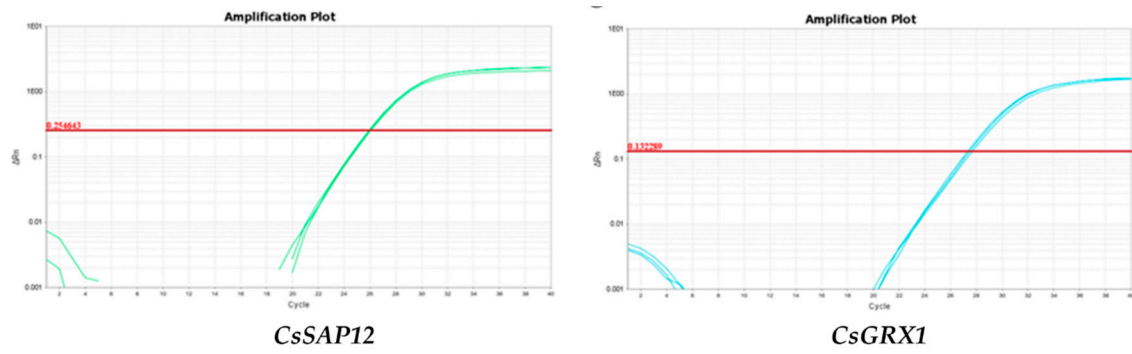

**Supplementary Figure S2.** The qRT-PCR amplification curve of *CsSAP12* and *SIGRX1*.

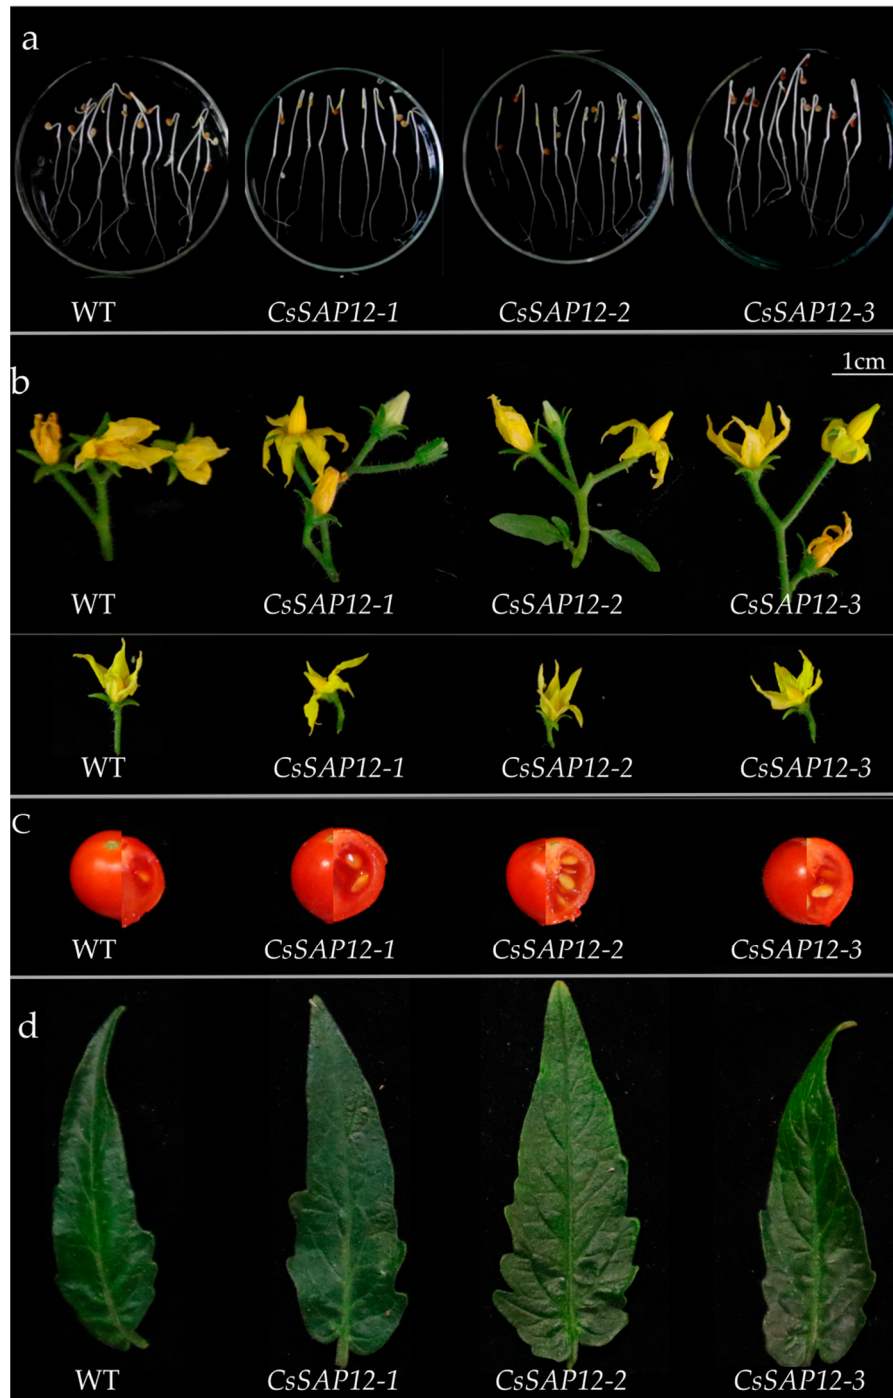

**Supplementary Figure S3.** Phenotypes of *CsSAP12* over-expressed transgenic and wildtype tomatoes. (a) Seeds germination; (b) Flower development; (c) Fruit development; (d) Leaf development. WT, wildtype; *CsSAP12-1*, 2, 3, *CsSAP12* over-expressed transgenic tomatoes.

**Supplementary Table S1.** Application of primers used for PCR and qRT-PCR.

| Use     | Primer Name    | Forward Primer (5'-3')            | Reverse Primer (5'-3')            |
|---------|----------------|-----------------------------------|-----------------------------------|
| PCR     | <i>CsSAP12</i> | ATGGCAGAGGAACAGAAATGGCAAGAA<br>CC | TCATATCTTCTCCAGCTTCTCTGCCTT<br>CT |
|         | <i>CsSAP1</i>  | CCAAACTTGCAGCTACCTCC              | TTGCACATCTACAGCAACACC             |
|         | <i>CsSAP2</i>  | TTGTTTCAATGCAAGCGTCT              | CATCGGCAATTGAAACCAGT              |
|         | <i>CsSAP3</i>  | CTGTGATTTTCATCTCCGGCTGT           | TTCTCTGCACACCGAACACC              |
|         | <i>CsSAP4</i>  | CCAAACTTGCAGCTACCTCC              | AGAAAGAACCTTCGCTTCCAC             |
|         | <i>CsSAP5</i>  | TTCTTTGGAAGTGCAGCAACC             | CTGAATCCACCTGATCCGTT              |
|         | <i>CsSAP6</i>  | CCAGACACCGGCCTTACCTG              | ATCGGGCATCAAGCGAACTCC             |
|         | <i>CsSAP7</i>  | TTAAGGTTTGCCTCAAGCATC             | CCATTAACATTCTCGAAGCC              |
|         | <i>CsSAP8</i>  | CACCTCGATCATGACGCCTCC             | AGTGTCTGAAATCCCCGATCCTG           |
|         | <i>CsSAP9</i>  | CGACGATGAACTTGTGCTCCA             | CGGATCTCCACACGAAACCC              |
| qRT-PCR | <i>CsSAP10</i> | CGAAGGTCCTATTTTGTGCAT             | ACTGAATCCACTTGATCCGTT             |
|         | <i>CsSAP11</i> | AACTCTCTAGCTCCGACGACT             | CTCACCGAACACGATCTCGAA             |
|         | <i>CsSAP12</i> | ACAAGCCTCCACTGCTAAGATCG           | CCGGCGCAGACAAAACCTCAC             |
|         | <i>CsSAP13</i> | GTTTCCGGCATCGTGACTCCT             | ATCCATCAGCCACGGAAGC               |
|         | <i>CsSAP14</i> | ACTCGACTAAAGCCGTTATGGAC           | ATTCAACCGCCGATGACTCC              |
|         | <i>SlGRX1</i>  | CATGGCGACCTTCAACATCTC             | CATCAGACTGCAGAGGCACGG             |
|         | <i>CsActin</i> | GGTGCCACAACCTTGATCTT              | GCCATCTTTGATTGGAATGG              |
|         | <i>SlActin</i> | TGTCCCTATCTACGAGGGTTATGC          | AGTTAAATCACGACCAGCAAGAT           |
